# Supplementary material for: Block catiomer with flexible cationic segment enhances complexation with siRNA and the delivery performance in vitro
Source: PubMed Central journal article supplement (PMC8519541; doi:10.1080/14686996.2021.1976055), 2021-10-13
Supplement: TSTA_A_1976055_SM4418.pdf [file TSTA_A_1976055_SM4418.pdf]

## ***Supplementary Information***

### **Block Cationomer with Flexible Cationic Segment Enhances Complexation with siRNA and the Delivery Performance in Vitro**

Wenqian Yang<sup>1,6</sup>, Takuya Miyazaki<sup>1,2,3</sup>, Pengwen Chen<sup>1,6</sup>, Taehun Hong<sup>1,6</sup>, Mitsuru Naito<sup>4</sup>, Yuji Miyahara<sup>2</sup>, Akira Matsumoto<sup>2,3</sup>, Kazunori Kataoka<sup>6</sup>, Kanjiro Miyata<sup>5,6</sup> and Horacio Cabral<sup>1,6\*</sup>

<sup>1</sup>*Department of Bioengineering, Graduate School of Engineering, The University of Tokyo, 7-3-1 Hongo, Bunkyo-ku, Tokyo 113-8656, Japan.*

<sup>2</sup>*Kanagawa Institute of Industrial Science and Technology, 705-1 Shimoimaizumi, Ebina, Kanagawa 243-0435, Japan.*

<sup>3</sup>*Institute of Biomaterials and Bioengineering, Tokyo Medical and Dental University, 2-3-10 Kanda-Surugadai, Chiyoda-ku, Tokyo 101-0062, Japan*

<sup>4</sup>*Center for Disease Biology and Integrative Medicine, Graduate School of Medicine, The University of Tokyo, 7-3-1 Hongo, Bunkyo-ku, Tokyo 113-0033, Japan*

<sup>5</sup>*Department of Materials Engineering, Graduate School of Engineering, The University of Tokyo, 7-3-1 Hongo, Bunkyo-ku, Tokyo 113-8656, Japan.*

<sup>6</sup>*Innovation Center of NanoMedicine, Kawasaki Institute of Industrial Promotion, 3-25-14, Tonomachi, Kawasaki-ku, Kawasaki 210-0821, Japan.*

Corresponding author:

Horacio Cabral

E-mail address: [horacio@bmw.t.u-tokyo.ac.jp](mailto:horacio@bmw.t.u-tokyo.ac.jp)

Department of Bioengineering, Graduate School of Engineering, The University of Tokyo, 7-3-1 Hongo, Bunkyo-ku, Tokyo 113-8656, Japan

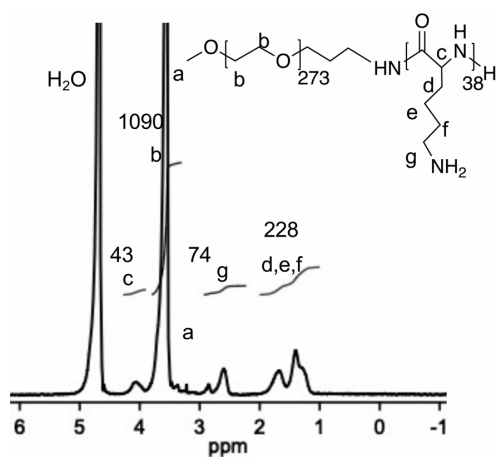

**Supplementary Figure 1.**  $^1\text{H-NMR}$  of PEG-PLL (polymer concentration: 10 mg/mL, solvent:  $\text{D}_2\text{O}$ , and temperature: 25  $^\circ\text{C}$ ).

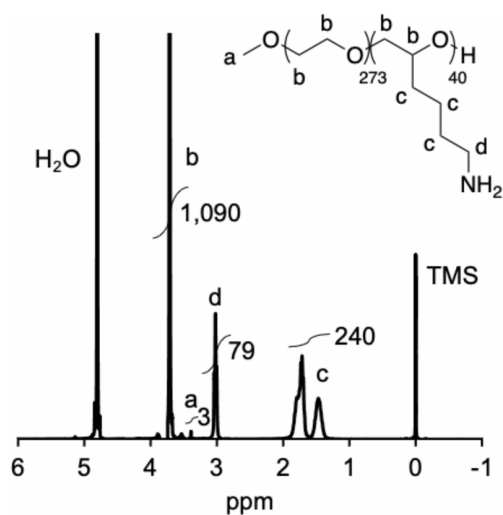

**Supplementary Figure 2.**  $^1\text{H-NMR}$  of PEG-PGBA (polymer concentration: 10 mg/mL, solvent:  $\text{D}_2\text{O}$ , and temperature: 25  $^\circ\text{C}$ ).

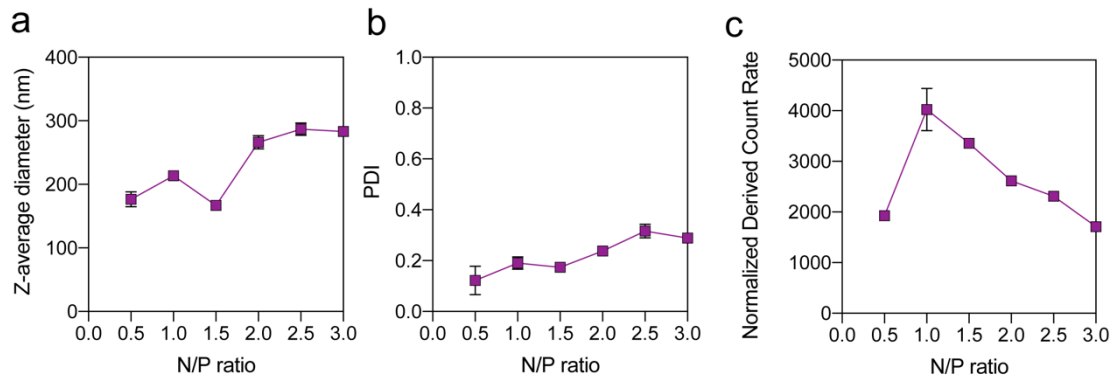

**Supplementary Figure 3.** DLS characterization of PIC structures from PEG-PGBA. (a) Z-average diameter, (b) polydispersity index (PDI), and (c) normalized derived count rate of PICs prepared with PEG-PGBA in 10mM HEPES and 150mM NaCl. The results are expressed as the mean  $\pm$  s.d. ( $n = 3$ ).

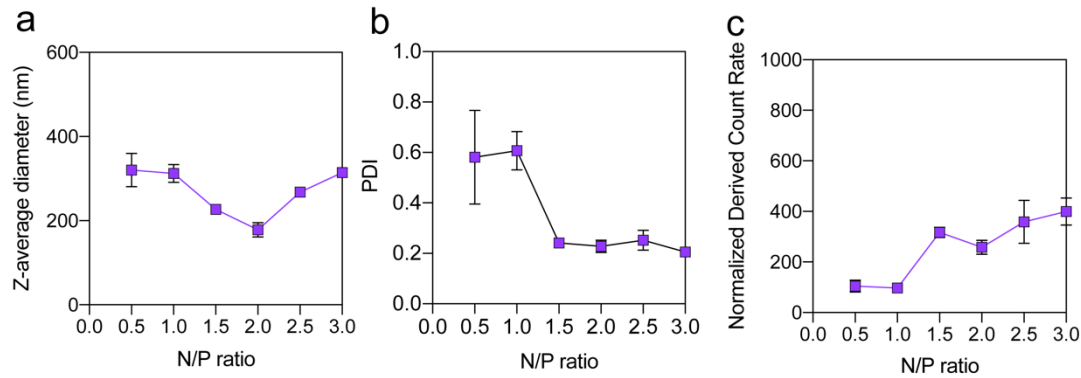

**Supplementary Figure 4.** DLS characterization of PIC structures from PEG-PGBA. (a) Z-average diameter, (b) polydispersity index (PDI), and (c) normalized derived count rate of PICs prepared with PEG-PGBA and diluted into a final siRNA concentration of 20 nM. The results are expressed as the mean  $\pm$  s.d. ( $n = 3$ ).

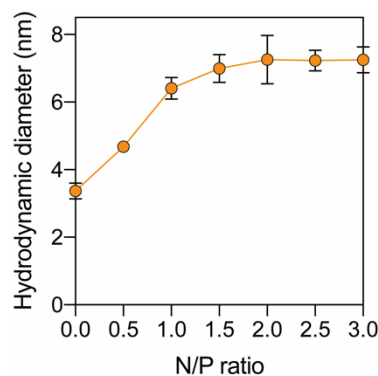

**Supplementary Figure 5.** The hydrodynamic diameter of PICs prepared with PEG-PLL at N/P ratio of 0.5, 1.0, 1.5, 2.0, 2.5 and 3.0. The results are expressed as the mean  $\pm$  s.d. ( $n = 10$ ).

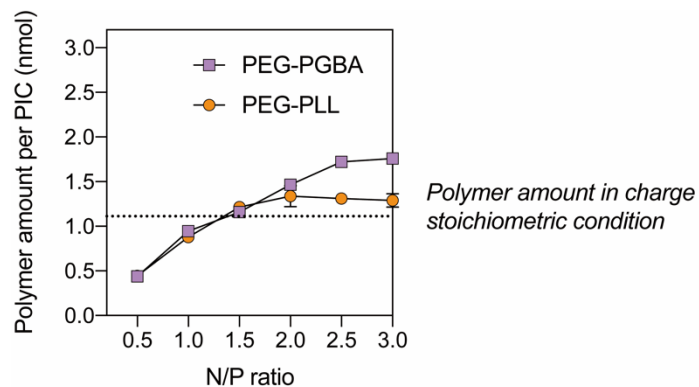

**Supplementary Figure 6.** The amount of polymer in siRNA PICs. The results are expressed as the mean  $\pm$  s.d. ( $n = 3$ ).

**Supplementary Table 1.** The association polymer number in uPIC ( $n = 10$ ).

| Sample         | N/P | Average Count per molecule of polymer<br>(mean $\pm$ s.d.) | Average Count per molecule of uPIC<br>(mean $\pm$ s.d.) | Average association polymer number<br>(mean $\pm$ s.d.) |
|----------------|-----|------------------------------------------------------------|---------------------------------------------------------|---------------------------------------------------------|
| PEG-PLL/siRNA  | 1   | 5.57 $\pm$ 0.17                                            | 5.79 $\pm$ 0.18                                         | 1.08 $\pm$ 0.04                                         |
| PEG-PGBA/siRNA | 1   | 5.29 $\pm$ 0.29                                            | 5.54 $\pm$ 0.92                                         | 1.05 $\pm$ 0.17                                         |

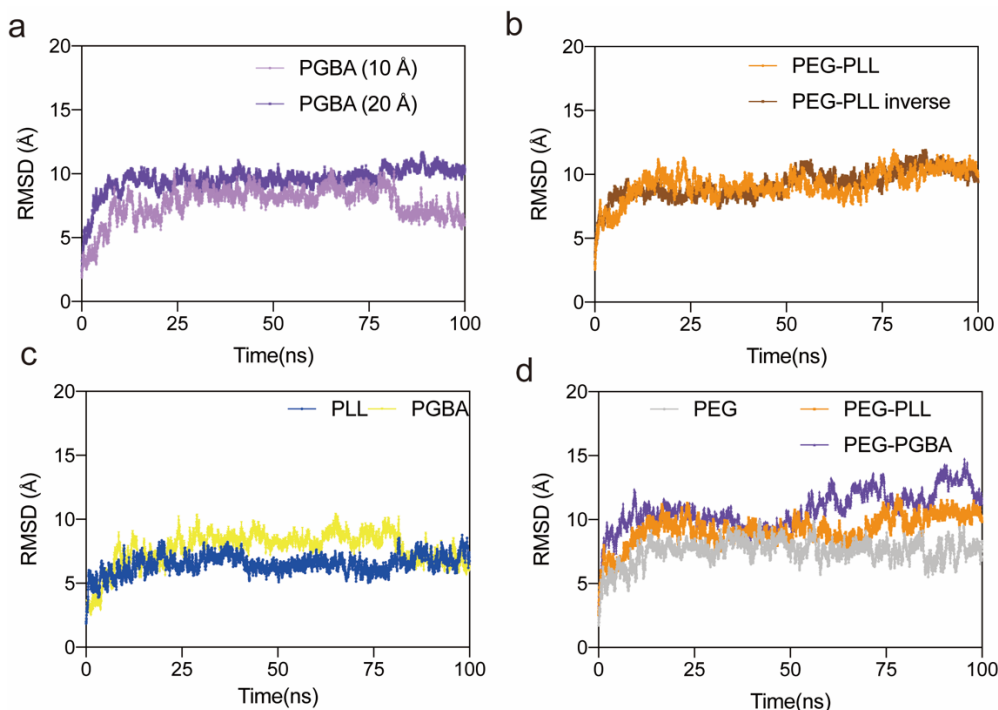

**Supplementary Figure 7.** Time evolution of root mean squared deviation (RMSD) of polymer/siRNA complex during molecular simulation. **(a)** Time evolution of RMSD of PGBA/siRNA at 10 Å and 20 Å. **(b)** Time evolution of RMSD of PEG-PLL/siRNA at two opposite direction. **(c)** Time evolution of RMSD of PEG-PLL/siRNA and PEG-

PGBA/siRNA. (d) Time evolution of RMSD of PEG, PEG-PLL and PEG-PGBA.

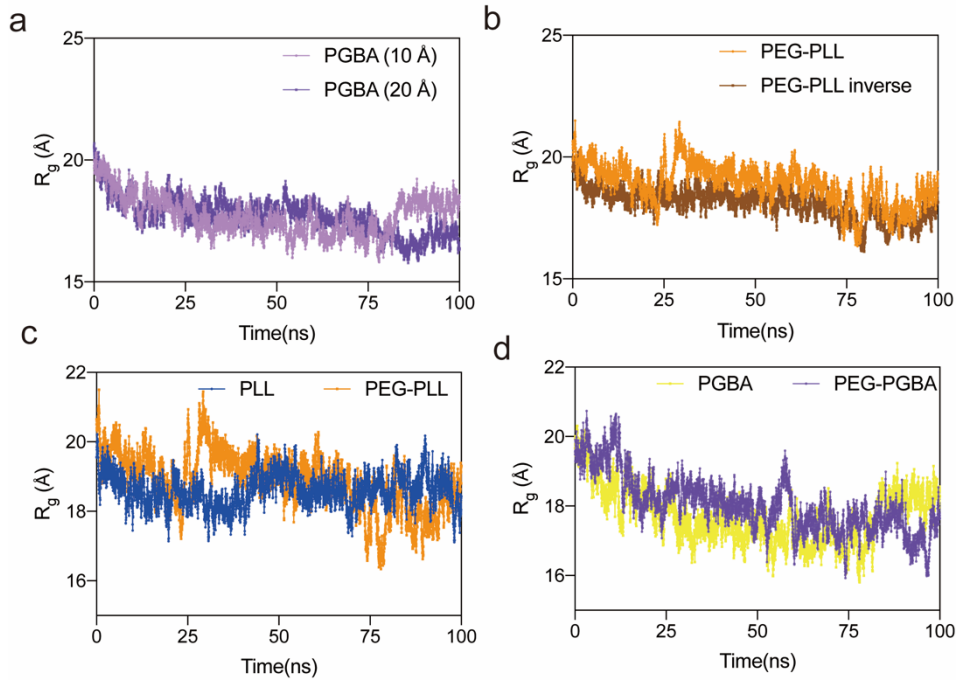

**Supplementary Figure 8.** Time evolution of Radius of gyration ( $R_g$ ) of polymer/siRNA complex during molecular simulation. (a) Time evolution of  $R_g$  of PGBA/siRNA at 10 Å and 20 Å. (b) Time evolution of  $R_g$  of PEG-PLL/siRNA at two opposite direction. (c) Time evolution of  $R_g$  of PLL/siRNA and PEG-PLL/siRNA. (d) Time evolution of  $R_g$  of PGBA and PEG-PGBA.

**Supplementary Table 2.** Energy binding of PGBA/siRNA in different distance and PEG-PLL siRNA opposite direction. Energies are normalized per charged amine, expressed in kcal mol<sup>-1</sup>.

| Complex                  | $\Delta E_{vdw}$ | $\Delta E_{ele}$ | $\Delta E_{GB}$ | $\Delta E_{SUFR}$ | $\Delta H_{bind}$ |
|--------------------------|------------------|------------------|-----------------|-------------------|-------------------|
| PGBA/siRNA (10 Å)        | -3.800           | -710.1           | 706.1           | -0.902            | -8.696            |
| PGBA/siRNA (20 Å)        | -3.125           | -734.7           | 728.9           | -0.919            | -9.827            |
| PEG-PLL/siRNA            | -2.758           | -638.2           | 636.1           | -0.677            | -5.612            |
| PEG-PLL/siRNA<br>inverse | -2.841           | -718.6           | 714.8           | -0.761            | -7.384            |

**Supplementary Table 3.** Energy binding for each system in Figure 6. Energies are normalized per charged amine, expressed in kcal mol<sup>-1</sup>.

| Complex        | $\Delta E_{vdw}$ | $\Delta E_{ele}$ | $\Delta E_{GB}$ | $\Delta E_{SUFR}$ | $\Delta H_{bind}$ |
|----------------|------------------|------------------|-----------------|-------------------|-------------------|
| PLL/siRNA      | -2.317           | -725.3           | 720.6           | -0.804            | -7.875            |
| PGBA/siRNA     | -3.800           | -710.1           | 706.1           | -0.902            | -8.696            |
| PEG/siRNA      | -3.224           | -1.308           | 3.049           | -0.346            | -1.828            |
| PEG-PLL/siRNA  | -2.758           | -638.2           | 636.1           | -0.677            | -5.612            |
| PEG-PGBA/siRNA | -4.118           | -702.4           | 699.3           | -0.925            | -8.126            |

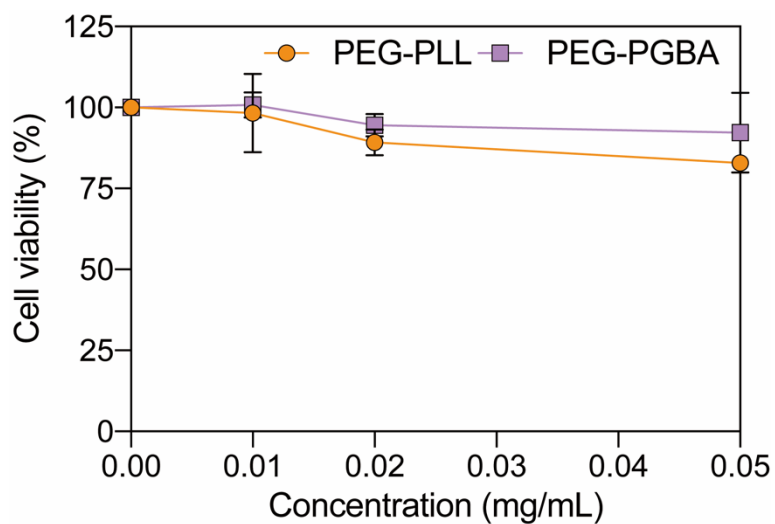

**Supplementary Figure 9.** Cytotoxicity of polymers studied by CCK-8 assay. HeLa-luc cells were incubated with polymers for 24 h.
